# Supplementary material for: Neural surprise in somatosensory Bayesian learning
Source: PubMed Central journal article supplement (PMC7880500; doi:10.1371/journal.pcbi.1008068), 2021-02-02
Supplement: pcbi.1008068.s001.pdf [file pcbi.1008068.s001.pdf]

**S1 Appendix. Bayesian learner models.** In this supplementary text we provide the derivations for the presented equations of the compared Bayesian learner models.

## Dirichlet-Categorical model

Given a sequence of observations  $y_1, \dots, y_t$  the Dirichlet-Categorical model combines the likelihood with the prior to refine the posterior estimates over the latent variable space (equation 4):

$$\begin{aligned} p(s_1, \dots, s_M | y_1, \dots, y_t) &\propto p(s_1, \dots, s_M | \alpha_1, \dots, \alpha_M) \prod_{i=1}^t p(y_i | s_1, \dots, s_M) \\ &= \prod_{j=1}^M s_j^{\alpha_j - 1} \prod_{i=1}^t \prod_{j=1}^M s_j^{\mathbf{1}\{y_i=j\}} \\ &= \prod_{j=1}^M s_j^{\alpha_j - 1 + \sum_{i=1}^t \mathbf{1}\{y_i=j\}} \end{aligned}$$

The posterior predictive distribution in equation 6 can be obtained by integrating over the space of latent states:

$$\begin{aligned} p(y_t = x | y_1, \dots, y_{t-1}) &= \int p(y_t = x | s_1, \dots, s_M) p(s_1, \dots, s_M | y_1, \dots, y_{t-1}) d\mathcal{S}_M \\ &= \int s_x \frac{\Gamma(\sum_{j=1}^M \alpha_j^t)}{\prod_{j=1}^M \Gamma(\alpha_j^t)} \prod_{j=1}^M s_j^{\alpha_j^t - 1} d\mathcal{S}_M \\ &= \frac{\Gamma(\sum_{j=1}^M \alpha_j^t)}{\prod_{j=1}^M \Gamma(\alpha_j^t)} \int \prod_{j=1}^M s_j^{\mathbf{1}\{x=j\} + \alpha_j^t - 1} d\mathcal{S}_M \\ &= \frac{\Gamma(\sum_{j=1}^M \alpha_j^t)}{\prod_{j=1}^M \Gamma(\alpha_j^t)} \frac{\prod_{j=1}^M \Gamma(\mathbf{1}\{x=j\} + \alpha_j^t)}{\Gamma(1 + \sum_{j=1}^M \alpha_j^t)} \\ &= \frac{\alpha_x^t}{\sum_{j=1}^M \alpha_j^t} \end{aligned}$$

The surprise readout functions for the Categorical-Dirichlet model introduced in equations 9 to 11 are:

### Predictive Surprise

$$\begin{aligned} PS(y_t) &= -\ln p(y_t | y_1, \dots, y_{t-1}) \\ &= -\ln \left( \prod_{j=1}^M \left( \frac{\alpha_x^t}{\sum_{j=1}^M \alpha_j^t} \right)^{\mathbf{1}\{y_t=j\}} \right) \end{aligned}$$

### Bayesian Surprise

$$BS(o_t) := KL(p(s_{t-1} | y_1, \dots, y_{t-1}) || p(s_t | y_1, \dots, y_t))$$

The general KL divergence for two Dirichlet distributions  $P$  and  $Q$  parametrized by  $\{\alpha_m\}_{m=1}^M$  and  $\{\alpha'_m\}_{m=1}^M$  is given by

$$\begin{aligned}
KL(P||Q) &= \mathbb{E}_{p(x)}[\log P(x) - \log Q(x)] \\
&= \mathbb{E}_{p(x)}[\log \Gamma(\sum_m \alpha_m) - \sum_m \log \Gamma(\alpha_m) + \sum_m (\alpha_m - 1) \log x_m \\
&\quad - \log \Gamma(\sum_m \alpha'_m) + \sum_m \log \Gamma(\alpha'_m) - \sum_m (\alpha'_m - 1) \log x_m] \\
&= \log \Gamma(\sum_m \alpha_m) - \sum_m \log \Gamma(\alpha_m) - \log \Gamma(\sum_m \alpha'_m) + \sum_m \log \Gamma(\alpha'_m) \\
&\quad - \sum_m (\alpha_m - \alpha'_m) \left( \psi(\alpha_m) - \psi(\sum_m \alpha_m) \right)
\end{aligned}$$

where  $\psi(\cdot)$  denotes the digamma function.

### Confidence-Corrected Surprise

$$CS(o_t) := KL(p(s_{t-1}|y_1, \dots, y_{t-1}) || \hat{p}(s_t|y_t))$$

The flat prior can be written as  $Dir(\alpha_1, \dots, \alpha_m)$  where  $\alpha_m = 1$  for all  $m = 1, \dots, M$ . The naive observer posterior simply updates the flat prior based on only the most recent observation  $y_t$ . Hence, we have that  $\hat{p}(s_t|y_t) = Dir(\alpha'_1, \dots, \alpha'_m)$  with  $\hat{\alpha}_m = 1 + \mathbf{1}_{y_t=m}$ . Hence at a given point in time  $t$ , we have:

$$\begin{aligned}
KL(p(s_{t-1}|y_1, \dots, y_{t-1}) || \hat{p}(s_t|y_t)) &= \log \Gamma(\sum_m \alpha_m^{t-1}) - \sum_m \log \Gamma(\alpha_m^{t-1}) - \log \Gamma(\sum_m \alpha_m^t) \\
&\quad + \sum_m \log \Gamma(\alpha_m^t) \\
&\quad - \sum_m (\alpha_m^{t-1} - \alpha_m^t) \left( \psi(\alpha_m^{t-1}) - \psi(\sum_m \alpha_m^{t-1}) \right)
\end{aligned}$$

### Hidden Markov Model

For the use of parameter inference via the expectation-maximisation algorithm and in order to derive the factorisation of the joint likelihood  $p(o_{1:t}, s_{1:t})$ , we will make sure of the following derivations:

$$\begin{aligned}
p(s_t|o_1, \dots, o_T) &= \frac{p(o_1, \dots, o_t|s_t)p(o_{t+1}, \dots, o_T|s_t)p(s_t)}{p(o_1, \dots, o_T)} \\
&= \frac{p(o_1, \dots, o_t, s_t)p(o_{t+1}, \dots, o_T|s_t)}{p(o_1, \dots, o_T)} \\
&= \frac{\alpha(s_t)\beta(s_t)}{p(o_1, \dots, o_T)}
\end{aligned}$$

where for the final line we have redefined the backward and forward probabilities as

$$\begin{aligned}
\alpha(s_t) &:= p(o_1, \dots, o_t, s_t) \\
\beta(s_t) &:= p(o_{t+1}, \dots, o_T|s_t) .
\end{aligned}$$

In the following, we derive the forward and backward equations which may be used in conjunction with a Dynamic Programming paradigm such as the Baum-Welch algorithm in order to perform the Expectation-Maximisation inference procedure.

$$\begin{aligned}\alpha(s_t) &= p(o_1, \dots, o_t, s_t) = p(o_t | s_t) p(o_1, \dots, o_{t-1}, s_t) \\ &= p(o_t | s_t) \sum_{s_{t-1}} \alpha(s_{t-1}) p(s_t | s_{t-1}) \\ \alpha(s_1) &= p(s_1) p(o_1 | s_1) = \prod_{k=1}^K \{\pi_k p(o_1 | s_{1k})\}^{s_{1k}}\end{aligned}$$

$$\begin{aligned}\beta(s_t) &= p(o_{t+1}, \dots, o_T | s_t) = \sum_{s_{t+1}} p(o_{t+1}, \dots, o_T, s_{t+1} | s_t) \\ &= \sum_{s_{t+1}} p(o_{t+2}, \dots, o_T | s_{t+1}) p(o_{t+1} | s_{t+1}) p(s_{t+1} | s_t) \\ &= \sum_{s_{t+1}} \beta(s_{t+1}) p(o_{t+1} | s_{t+1}) p(s_{t+1} | s_t) \\ \beta(s_T) &= 1\end{aligned}$$

Both expressions for  $\alpha$  and  $\beta$  involve a backward and forward recursion. Given a sequence of observations, these can easily be computed in a sequential fashion. The final quantity of interest for the EM algorithm are the smoothed transition probabilities:

$$p(s_{t-1}, s_t | o_1, \dots, o_T) = \frac{\alpha(s_{t-1}) p(o_t | s_t) p(s_t | s_{t-1}) \beta(s_t)}{p(o_1, \dots, o_T)}$$

In order to infer the parameters we now alternate between an expectation and a maximisation step:

$$p(o_{1:t}, z_{1:t}) = \prod_{t=1}^T p(o_t | s_t) p(s_1) \prod_{t=2}^T p(s_t | s_{t-1})$$

### 1. Expectation:

$$\begin{aligned}\mathbb{E}[\ln p(o_{1:t}, s_{1:t})] &= \sum_{t=1}^T \sum_{k=1}^K \mathbb{E}[s_{tk}] \ln B_{jk} + \sum_{k=1}^K \mathbb{E}[s_{1k}] \ln \pi_k \\ &\quad + \sum_{t=2}^T \sum_{j=1}^K \sum_{k=1}^K \mathbb{E}[s_{t-1j} s_{tk}] \ln A_{jk} \\ &= \sum_{t=1}^T \sum_{k=1}^K \frac{\alpha(s_{tk}) \beta(s_{tk})}{p(o_1, \dots, o_T)} \ln B_{jk} + \sum_{k=1}^K \frac{\alpha(s_{1k}) \beta(s_{1k})}{p(o_1, \dots, o_T)} \ln \pi_k \\ &\quad + \sum_{t=2}^T \sum_{j=1}^K \sum_{k=1}^K \frac{\alpha(s_{t-1j}) \prod_{m=1}^M B_{mk}^{1_{o_t=m}} A_{jk} \beta(s_{tk})}{p(o_1, \dots, o_T)} \ln A_{jk}\end{aligned}$$

2. **Maximization:** The Lagrangian with the necessary constraints is determined (i.e. row stochasticity and proper distributions) and the derivatives with respect

to the set of parameters ( $\theta = \{A_{jk}, B_{mk}, \pi_k\}$ ) is computed.

$$\begin{aligned} \mathcal{L}(\theta) := & \mathbb{E}[\ln p(o_{1:t}, z_{1:t})] + \lambda \left( \sum_k \pi_k - 1 \right) + \sum_{m=1}^M \lambda_m^B \left( \sum_k B_{mk} - 1 \right) \\ & + \sum_{k=1}^K \lambda_k^A \left( \sum_j A_{kj} - 1 \right) \end{aligned}$$

The filtering equation can then be written as

$$p(s_t | o_1, \dots, o_t) = \frac{p(o_1, \dots, o_t, s_t)}{p(o_1, \dots, o_t)} = \frac{\alpha(s_t)}{\sum_{s_t} \alpha(s_t)}$$

Finally, the evaluation is then easily obtained by marginalising over the hidden state:

$$p(o_1, \dots, o_t) = \sum_{s_t} \alpha(s_t)$$

For timestep  $t$  the HMM was fit for a stimulus sequence  $o_1, \dots, o_t$  which gives a set of parameter estimates,  $\hat{\pi}_t, \hat{A}_t, \hat{B}_t$  and the filtering posterior  $\hat{\gamma}_t(s_t) = p(s_t | o_1, \dots, o_t)$ . The predictive surprise as formulated in equation 12 is derived in the following way:

$$\begin{aligned} PS(o_{t+1}) &:= -\ln p(o_{t+1} | s_{t+1}) = -\ln p(o_{t+1} | o_1, \dots, o_t) \\ &= -\ln(p(o_{t+1} | s_{t+1}) p(s_{t+1} | s_t) p(s_t | o_1, \dots, o_t)) \\ &\approx -\ln(\hat{B}_t^T \hat{A}_t^T \hat{\gamma}_t(s_t)) \end{aligned}$$

The Bayesian surprise from equation 13, on the other hand, derives for the HMM as follows:

$$\begin{aligned} BS(o_{t+1}) &:= KL(p(s_t | o_t, \dots, o_1) || p(s_{t+1} | o_{t+1}, \dots, o_1)) \\ &= \sum_k^K p(s_t | o_t, \dots, o_1) \ln \frac{p(s_t | o_t, \dots, o_1)}{p(s_{t+1} | o_{t+1}, \dots, o_1)} \\ &\approx \sum_k^K \hat{\gamma}_t(s_t = k) \ln \frac{\hat{\gamma}_t(s_t = k)}{\hat{\gamma}_{t+1}(s_{t+1} = k)} \end{aligned}$$

Finally, confidence corrected surprise from equation 14 may be expressed as a linear combination of predictive surprise, Bayesian surprise, a model commitment term (negative entropy)  $C(p(s_t))$ , and a data-dependent constant scaling the state space  $O(t)$ .

$$\begin{aligned} C(p(s_{t+1} | o_1, \dots, o_{t+1})) &= -H(p(s_{t+1} | o_1, \dots, o_{t+1})) \\ &= \sum_{k=1}^K p(s_{t+1} = k | o_1, \dots, o_{t+1}) \ln(p(s_{t+1} = k | o_1, \dots, o_{t+1})) \\ &\approx \sum_{k=1}^K \hat{\gamma}_{t+1}(s_{t+1} = k) \ln \hat{\gamma}_{t+1}(s_{t+1} = k) \\ O(t+1) &= \sum_{k=1}^K p(o_{t+1} | s_{t+1}) \approx \sum_{k=1}^K \hat{B}_t^{o_{t+1}, k} \end{aligned}$$

$$CS(o_t) = BS(o_t) + PS(o_t) + C(p(s_t)) + \ln O(t)$$

All inference types shared the same state space  $s \in \mathcal{S} = \{0, 1\}$ . Due to the transformation of the observation sequence the observation space differed between models:

Stimulus probability model:  $y_t = o_t$  for  $t = 1, \dots, T$  with  $\mathcal{O}_{SP} = \{0, 1\}$

Alternation probability model:  $y_t = d_t$  for  $t = 2, \dots, T$  with  $\mathcal{O}_{AP} = \{0, 1\}$  and  $d_t = 1_{o_t \neq o_{t-1}}$

Transition probability model 1st Order:  $y_t = e_t^i$  for  $t = 2, \dots, T$  with  $\mathcal{O}_{TP1} = \{0, 1, 2, 3\}$  as  $e_t^i$  belongs to the set containing each possible transition from  $o_{t-1} = i$ .

Transition probability model 2nd Order:  $y_t = e_t^j$  for  $t = 3, \dots, T$  with  $\mathcal{O}_{TP2} = \{0, 1, 2, 3, 4, 5, 6, 7\}$  as  $e_t^j$  belongs to the set containing each possible transition from  $o_{t-2} = j$ .
