# Supplementary material for: Neural surprise in somatosensory Bayesian learning
Source: PubMed Central journal article supplement (PMC7880500; doi:10.1371/journal.pcbi.1008068), 2021-02-02
Supplement: pcbi.1008068.s002.pdf [file pcbi.1008068.s002.pdf]

**S2 Appendix. Variational inference algorithm.** In this supplementary text we present the algorithm used to approximate log model evidence for subsequent Bayesian model comparison.

## A free-form variational inference algorithm for general linear models with spherical error covariance matrix.

We consider variational inference for probabilistic models of the form

$$p(y, \beta, \lambda) = p(y|\beta, \lambda)p(\beta)p(\lambda),$$

where

$$p(y|\beta, \lambda) := N(y; X\beta, \lambda^{-1}I_n), \quad p(\beta) = N(\beta; 0_p, \alpha^{-1}I_p), \quad \text{and} \quad p(\lambda) = G(\lambda; \beta_\lambda, \gamma_\lambda).$$

Here,  $y \in \mathbb{R}^n$  denotes the observed random variable modeling data,  $\beta \in \mathbb{R}^p$ ,  $\lambda > 0$  denote unobserved random variables modeling regression weights and observation noise precisions, respectively, and  $X \in \mathbb{R}^{n \times p}$  denotes a design matrix. The parameter-conditional distribution of  $y$  is specified in terms of a multivariate Gaussian density with expectation parameter  $X\beta \in \mathbb{R}^n$  and a spherical covariance matrix parameter  $\lambda^{-1}I_n$ . The marginal (or prior) distribution of  $\beta$  is specified in terms of a multivariate Gaussian density with zero expectation parameter  $0_p \in \mathbb{R}^p$  and covariance matrix parameter  $\alpha^{-1}I_p$ , where  $\alpha > 0$  denotes a precision parameter. Finally, the distribution of  $\lambda$  is specified in terms of a Gamma density in its shape and scale parameterization, where  $\beta_\lambda, \gamma_\lambda > 0$  denote the shape and scale parameters, respectively.

### Model estimation

Application of the free-form variational inference theorem yields an algorithm that, upon convergence, furnishes an approximation to the data-conditional (posterior) parameter distribution of the form

$$q(\beta)q(\lambda) \approx p(\beta, \lambda|y).$$

Here, the variational distributions take the form

$$q(\beta) = N(\beta; m_\beta, S_\beta) \quad \text{and} \quad q(\lambda) = G(\lambda; b_\lambda, c_\lambda),$$

where  $m_\beta \in \mathbb{R}^p$  and  $S_\beta \in \mathbb{R}^{p \times p}$  denote the converged variational expectation and covariance parameters, respectively, while  $b_\lambda, c_\lambda > 0$  denote the converged variational shape and scale parameters. Finally, the algorithm furnishes, upon convergence, the variational free energy lower bound

$$F(q(\beta)q(\lambda)) \leq \ln \iint p(y, \beta, \lambda) d\lambda d\beta = \ln p(y)$$

to the log marginal likelihood, also known as log model evidence.

The algorithm takes the following form

#### Initialization

0. Set

$$q^{(0)}(\beta) := N(\beta; m_\beta^{(0)}, S_\beta^{(0)}) \quad \text{and} \quad q^{(0)}(\lambda) := G(\lambda; b_\lambda^{(0)}, c_\lambda^{(0)})$$

with variational parameters

$$m_\beta^{(0)} := 0_p, \quad S_\beta^{(0)} := \alpha^{-1}I_p$$

and

$$b_\lambda^{(0)} := \beta_\lambda, \quad c_\lambda^{(0)} := \frac{n}{2} + \gamma_\lambda,$$

respectively. Define a convergence criterion  $\delta > 0$  and a maximum number of iterations  $n_i$ .

### ***Iterations***

For  $i = 1, \dots, n_i$  or until convergence is reached

#### 1. $q(\beta)$ update

Set

$$q^{(i)}(\beta) := N\left(\beta; m_\beta^{(i)}, S_\beta^{(i)}\right)$$

where

$$S_\beta^{(i)} := \left(b_\lambda^{(i-1)} c_\lambda^{(i-1)} X^T X + \alpha I_p\right)^{-1}$$

and

$$m_\beta^{(i)} := b_\lambda^{(i-1)} c_\lambda^{(i-1)} S_\beta^{(i)} X^T y$$

#### 2. $q(\lambda)$ update

Set

$$q^{(i)}(\lambda) := G\left(\lambda; b_\lambda^{(i)}, c_\lambda^{(i)}\right)$$

where

$$b_\lambda^{(i)} := \left(\frac{1}{2} \left(\text{tr}\left(S_\beta^{(i)} X^T X\right) + \left(y - X m_\beta^{(i)}\right)^T \left(y - X m_\beta^{(i)}\right)\right) + \frac{1}{\beta_\lambda}\right)^{-1}$$

and

$$c_\lambda^{(i)} := \frac{n}{2} + \gamma_\lambda.$$

Note that  $c_\lambda^{(i)}$  stays constant throughout.

#### 3. $F(q(\beta)q(\lambda))$ update

Set

$$F^{(i)} := F\left(q^{(i)}(\beta)q^{(i)}(\lambda)\right),$$

where

$$F\left(q^{(i)}(\beta)q^{(i)}(\lambda)\right) := L_a^{(i)} - \text{KL}\left(q^{(i)}(\beta) \parallel p(\beta)\right) - \text{KL}\left(q^{(i)}(\lambda) \parallel p(\lambda)\right)$$

where with the digamma function  $\psi$ ,  $L_a^{(i)}$  denotes the average likelihood term

$$L_a^{(i)} := -\frac{n}{2} \ln 2\pi - \frac{1}{2} b_\lambda^{(i)} c_\lambda^{(i)} \left(y - X m_\beta^{(i)}\right)^T \left(y - X m_\beta^{(i)}\right) - \frac{1}{2} b_\lambda^{(i)} c_\lambda^{(i)} \text{tr}\left(S_\beta^{(i)} X^T X\right) + \frac{n}{2} \psi\left(c_\lambda^{(i)}\right) + \ln b_\lambda^{(i)}$$

and  $\text{KL}(q(x) \parallel p(x))$  denotes the KL-divergence between the densities  $q(x)$  and  $p(x)$ .

#### 4. Convergence assessment

If  $i > 1$ , evaluate

$$\delta_F = F^{(i)} - F^{(i-1)}.$$

Then,

- if  $\delta_F < 0$ , i.e., the variational free energy has decreased, issue a warning and end the algorithm,
- if  $0 < \delta_F < \delta$ , i.e., the variational free energy has increased less than  $\delta$ , end the algorithm and declare convergence,
- else go to 1.

### Prior variational distributions

In order to select the probabilistic model of interest that minimizes Type II errors under the constraint of minimizing Type I errors the following test procedure was implemented. Data was simulated with low signal-to-noise levels (true, but unknown,  $\lambda = 0.001$  and  $\beta = [1; 1]$ ) and underwent z-score normalization, after which model retrieval was evaluated for a range of values for the precision parameter  $\alpha$ . For data generated by the null model, a range of values of  $\alpha$  was determined for which false positives were highly unlikely (exceedence probability  $\phi = 1$  in favour of the null model in every one of the 100 iterations). Next, for data generated by the non-null models, the value of  $\alpha$  was selected which lied within the previously established range and for which the difference in log model evidence between null and non-null models was maximized. This procedure yielded the following prior distributions which were used in all described evaluations.

$$q^{(0)}(\beta) := N(\beta; \mathbf{0}_p, 0.001I_p) \text{ and } q^{(0)}(\lambda) := G(\lambda; 10, 0.1)$$
